# Supplementary material
Source: PubMed Central journal article supplement (PMC3766380)
Supplement: NIHMS472471-supplement-supplement_1.pdf [file NIHMS472471-supplement-supplement_1.pdf]

**Cyclooxygenase inhibition improves endothelial vasomotor dysfunction of visceral adipose arterioles in human obesity**

Melissa G. Farb PhD, Stephanie Tiwari, Shakun Karki PhD, Doan TM Ngo PhD, Brian Carmine MD, Donald T. Hess MD, Maria A. Zuriaga PhD, Kenneth Walsh PhD, Jessica L. Fetterman PhD, Naomi M. Hamburg MD, MS, Joseph A. Vita MD, Caroline M. Apovian MD and Noyan Gokce MD

**Supplemental Materials**

Supplemental figure I  
Supplemental figure II  
Supplemental figure III

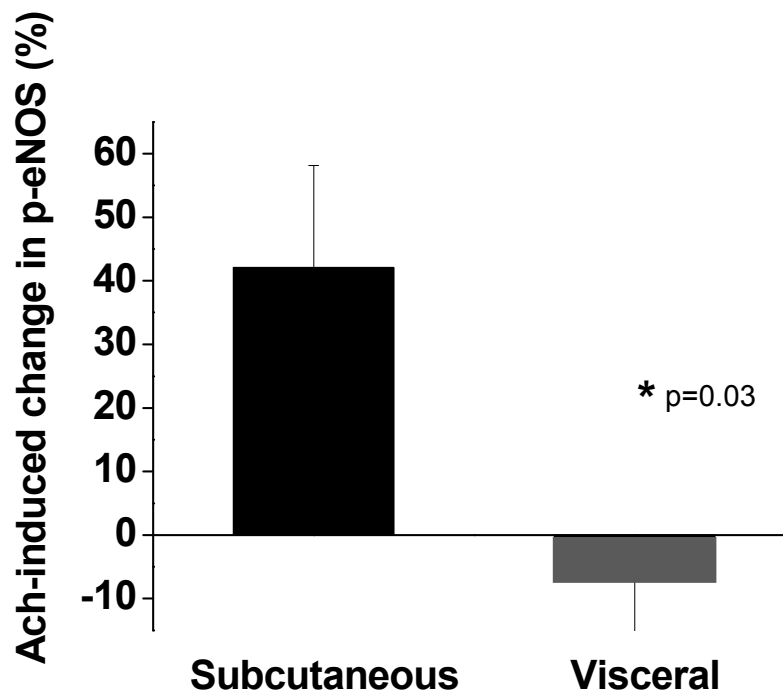

**Supplemental figure I:** Ach-induced phosphorylation of eNOS at serine 1177 is impaired in endothelial cells isolated from visceral compared to subcutaneous depots. \*  $p < 0.05$ ,  $n = 7$ .

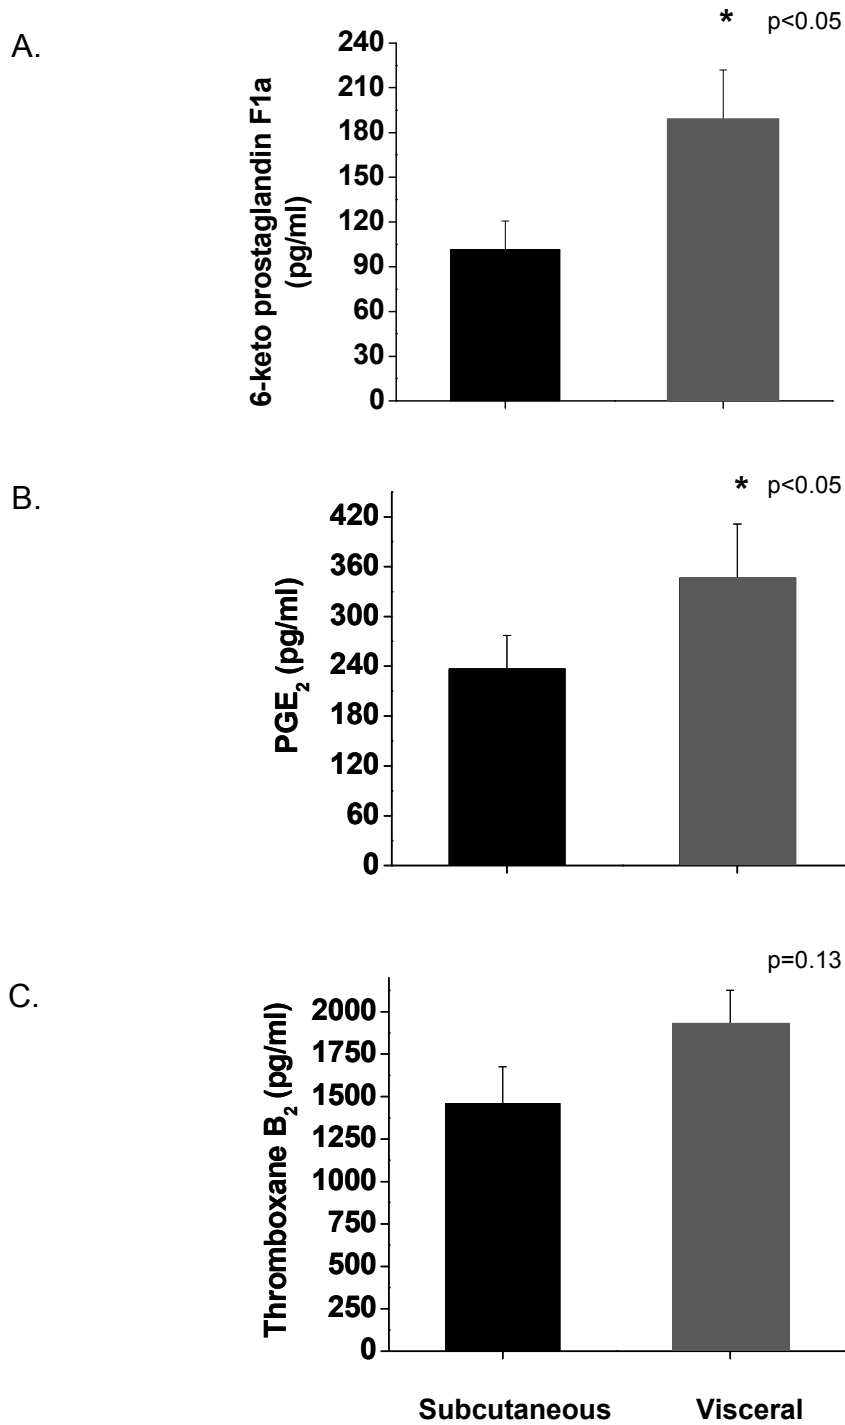

**Supplemental figure II:** 6-keto F alpha (A) production (metabolite of PGI<sub>2</sub>) and PGE<sub>2</sub> (B) were significantly higher in the supernatant of cultured visceral compared to subcutaneous fat tissue (\*p<0.05), and TBX<sub>2</sub> (C) also trended higher in visceral fat.

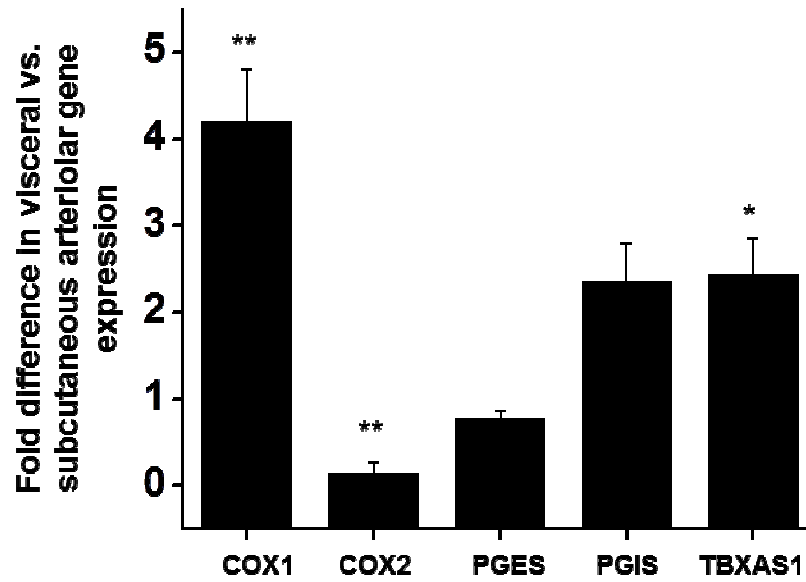

**Supplemental figure III:** Expression of cyclooxygenases and synthases relevant to prostanoid production were upregulated in visceral arterioles compared to subcutaneous vessels (n=7).

COX1=Cyclooxygenase-1, COX2=Cyclooxygenase-2, PGES=Prostaglandin E synthase, PGIS=Prostaglandin I synthase, TBXAS=Thromboxane synthase. \*\*p<0.01 and \*p<0.05.
